CORRECTION

# Correction: Depletion of the Chromatin Looping Proteins CTCF and Cohesin Causes Chromatin Compaction: Insight into Chromatin Folding by Polymer Modelling

The *PLOS Computational Biology* Staff

Ingrid M. van der Wateren should be included as a co-author of this paper.

The author's affiliation is as follows:

Swammerdam Institute for Life Sciences, University of Amsterdam, Amsterdam, The Netherlands

The author list should read as follows:

Mariliis Tark-Dame, Hansjoerg Jerabek, Erik M. M. Manders, Ingrid M. van der Wateren, Dieter W. Heermann, Roel van Driel

The author contributions section should read as follows:

Conceived and designed the experiments: RvD DWH MTD HJ.

Performed the experiments: MTD HJ IMvdW.

Analyzed the data: MTD HJ IMvdW.

Contributed reagents/materials/analysis tools: EMMM.

Wrote the paper: MTD RvD HJ DWH.

The citation for this paper should be as follows:

Tark-Dame M, Jerabek H, Manders EMM, van der Wateren IM, Heermann DW, van Driel R (2014) Depletion of the Chromatin Looping Proteins CTCF and Cohesin Causes Chromatin Compaction: Insight into Chromatin Folding by Polymer Modelling. *PLoS Comput Biol* 10(10): e1003877. doi:[10.1371/journal.pcbi.1003877](https://doi.org/10.1371/journal.pcbi.1003877)

The authors confirm that the addition of this co-author does not affect the competing interest statement or funding statement.

## Reference

1. Tark-Dame M, Jerabek H, Manders EMM, Heermann DW, van Driel R (2014) Depletion of the Chromatin Looping Proteins CTCF and Cohesin Causes Chromatin Compaction: Insight into Chromatin Folding by Polymer Modelling. *PLoS Comput Biol* 10(10): e1003877. doi: [10.1371/journal.pcbi.1003877](https://doi.org/10.1371/journal.pcbi.1003877) PMID: [25299688](https://pubmed.ncbi.nlm.nih.gov/25299688/)

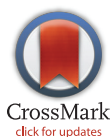

## OPEN ACCESS

**Citation:** The *PLOS Computational Biology* Staff (2016) Correction: Depletion of the Chromatin Looping Proteins CTCF and Cohesin Causes Chromatin Compaction: Insight into Chromatin Folding by Polymer Modelling. *PLoS Comput Biol* 12(1): e1004716. doi:[10.1371/journal.pcbi.1004716](https://doi.org/10.1371/journal.pcbi.1004716)

**Published:** January 15, 2016

**Copyright:** © 2016 The PLOS Computational Biology Staff. This is an open access article distributed under the terms of the [Creative Commons Attribution License](https://creativecommons.org/licenses/by/4.0/), which permits unrestricted use, distribution, and reproduction in any medium, provided the original author and source are credited.
